# Supplementary material for: Diagnostic Accuracy Study of an Oscillometric Ankle-Brachial Index in Peripheral Arterial Disease: The Influence of Oscillometric Errors and Calcified Legs
Source: PubMed Central journal article supplement (PMC5127576; doi:10.1371/journal.pone.0167408), 2016-11-29
Supplement: pone.0167408.s011.pdf [file pone.0167408.s011.pdf]

|                                                   | <b>PAD positive</b><br>(Doppler ABI < 0.9) | <b>PAD negative</b><br>(Doppler ABI ≥ 0.9) | <b>Total</b> |
|---------------------------------------------------|--------------------------------------------|--------------------------------------------|--------------|
| <b>Test positive</b><br>(Oscillometric ABI < 0.9) | 18                                         | 4                                          | 22           |
| <b>Test negative</b><br>(Oscillometric ABI ≥ 0.9) | 9                                          | 120                                        | 129          |
| <b>Total</b>                                      | 27                                         | 124                                        | 151          |
